# Supplementary material for: Artificial intelligence for quantifying immune infiltrates interacting with stroma in colorectal cancer
Source: Springer Nature journal article supplement (doi:10.1186/s12967-022-03666-3), 2022-10-04
Supplement: MOESM1 [file 23570008]

## **Additional file for**

*Artificial intelligence for quantifying immune infiltrates interacting with stroma in colorectal cancer*

### **This PDF file includes:**

Additional Methods

Additional Figures (S1–S4)

Additional Tables (S1–S4)

## **Additional Methods**

**Exclusion criteria were as follows**

(1) Neo-adjuvant therapy (radiotherapy, chemotherapy); (2) Death within 30 days of surgery; (3) Follow-up information missing; (4) Hematoxylin and eosin-stained whole-slide images unavailable or poor image quality.

**Whole-slide images acquisition**

Pathologists from three centers selected one tumor block from each patient that contained the most invasive part of the primary tumor. One tissue paraffin section of 4–5  $\mu\text{m}$  was stained with hematoxylin and eosin for all patients. The slides were digitized using digital slide scanner (Aperio AT2 or GT 450, Leica, USA; KF-PRO-020, KFBIO, China) at 40 $\times$  magnification (resolution: 0.24–0.26  $\mu\text{m}/\text{pixel}$ ).

## **Additional Figures**

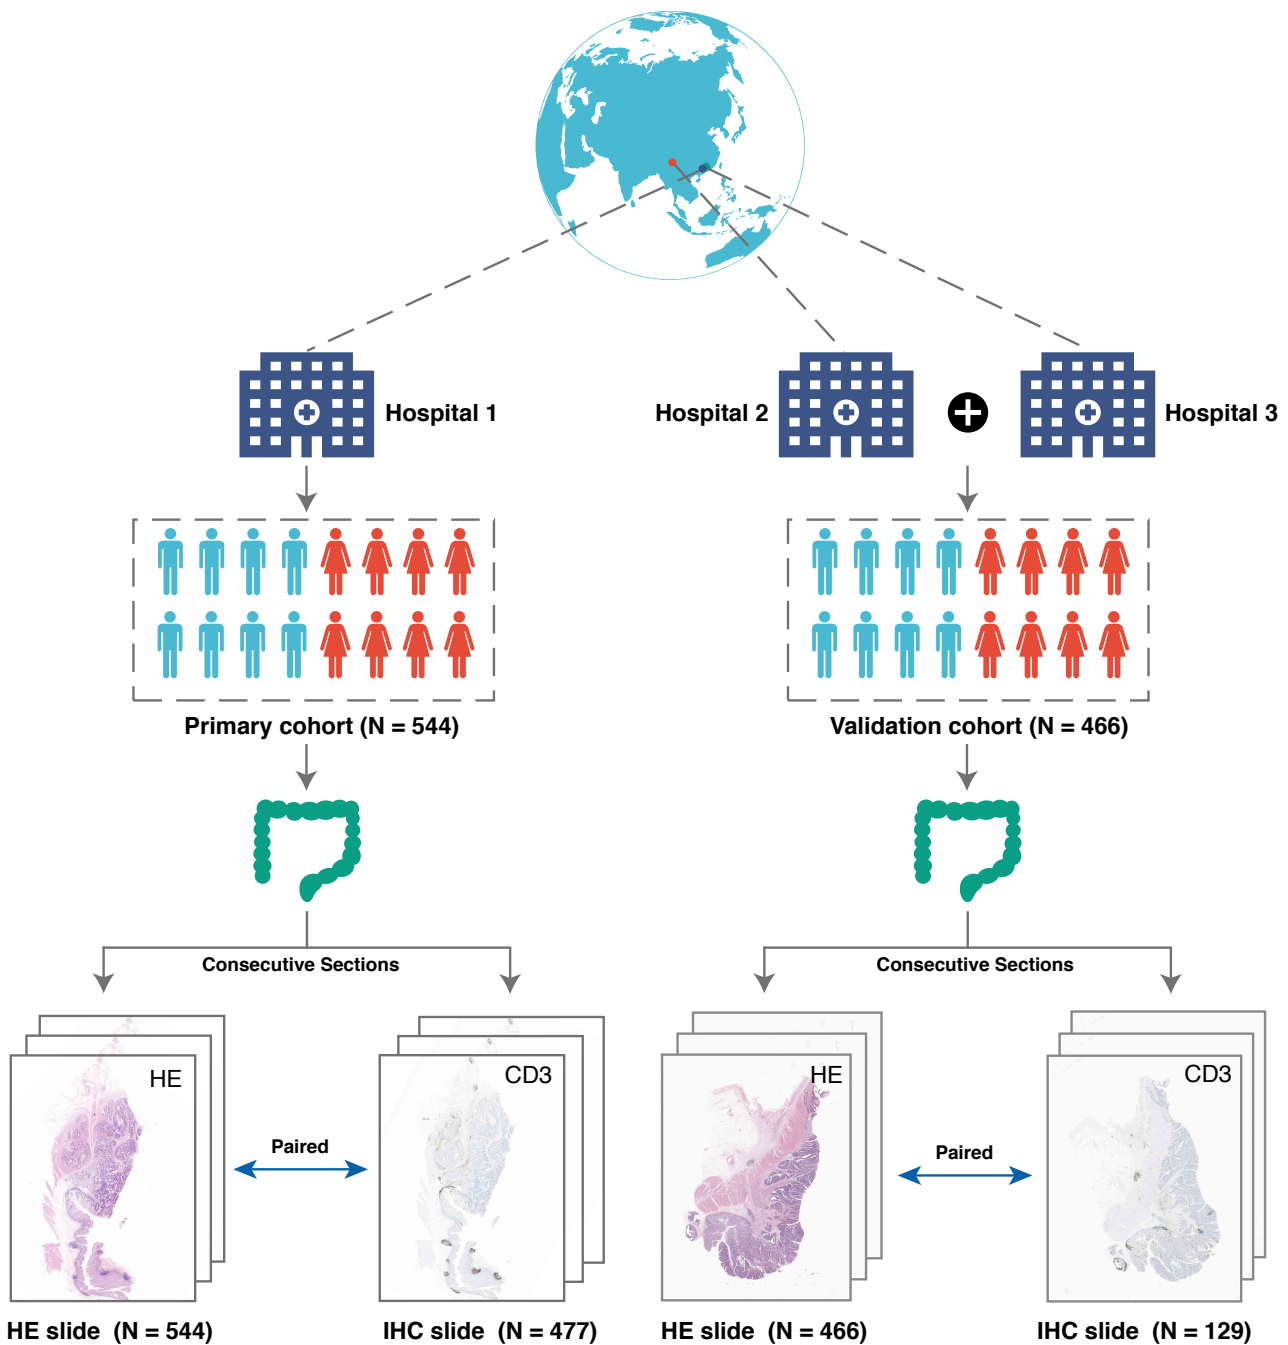

**Fig. S1 Study profile.** The primary cohort (N = 544) consists of colorectal cancer (CRC) patients from Hospital 1, and the validation cohort (N = 466) includes patients from Hospital 2 and Hospital 3. One tissue paraffin section of 4–5  $\mu$ m was stained with hematoxylin and eosin (HE) for all patients (N = 544 in the primary cohort, N = 466 in the validation cohort). And the consecutive sections were processed for immunohistochemistry (IHC) for a subgroup of all patients (N = 477 in the primary cohort, N = 129 in the validation cohort).

**A**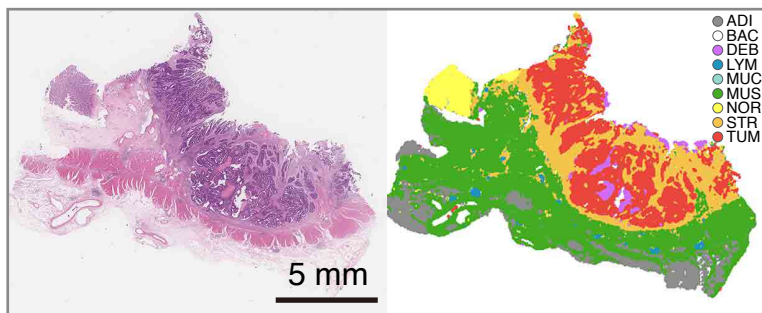**Stain & scanner information****Center:** GDPH**Stain:** HE**Stain location:** Department of pathology, GDPH**Scanner:** Aperio AT2, Leica, USA**B**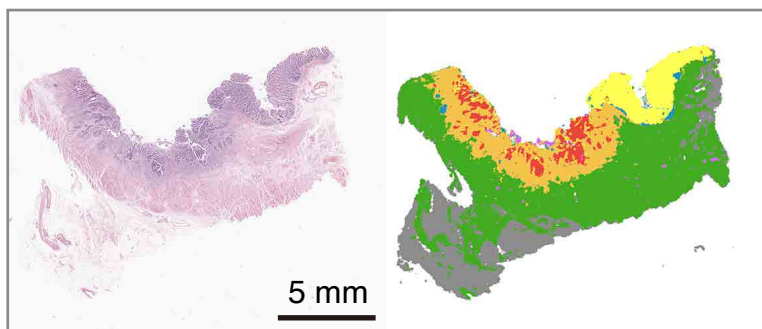**Center:** SYSU6**Stain:** HE**Stain location:** Department of pathology, GDPH**Scanner:** Aperio GT 450, Leica, USA**C**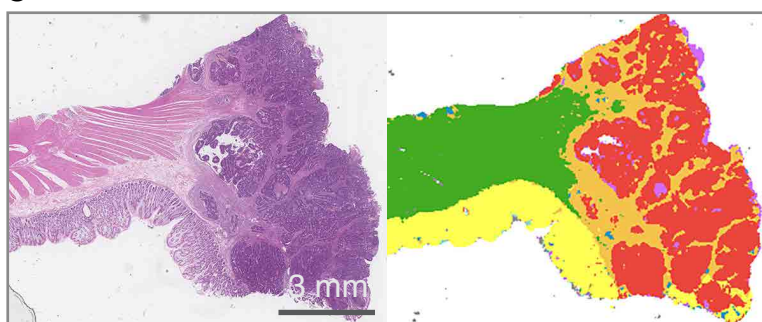**Center:** YNCH**Stain:** HE**Stain location:** Department of pathology, YNCH**Scanner:** Aperio AT2, Leica, USA**D**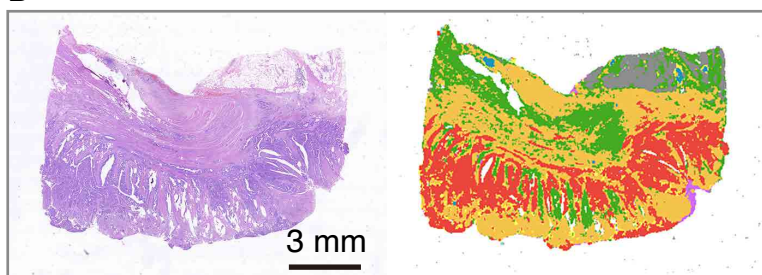**Center:** YNCH**Stain:** HE**Stain location:** Department of pathology, YNCH**Scanner:** KF-PRO-020, KFBIO, China

**Fig. S2 HE-stained WSIs and tissue segmentation from three hospitals.** GDPH, Guangdong Provincial People's Hospital; YNCH, Yunnan Cancer Hospital; SYSU6, The Sixth Affiliated Hospital of Sun Yat-sen University; HE, hematoxylin and eosin; WSI, whole-slide image.

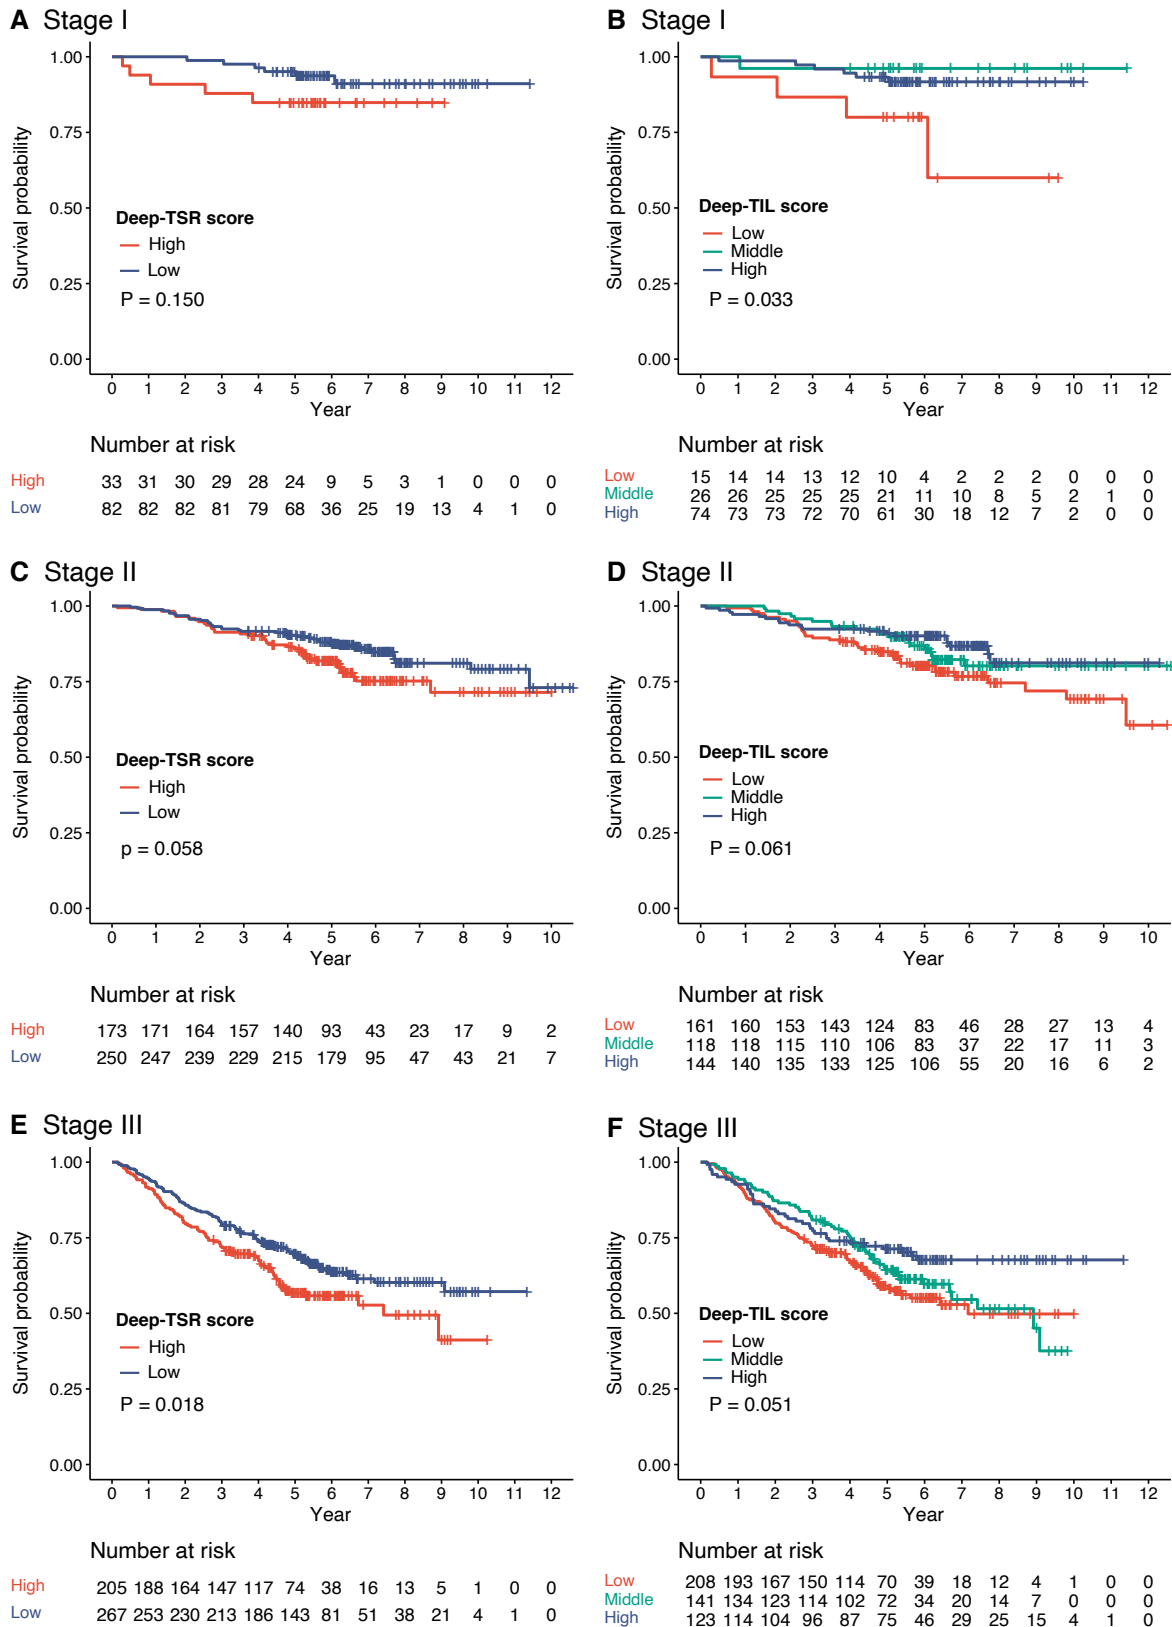

**Fig. S3 Kaplan–Meier plots for all patients according to Deep-TSR and Deep-TIL scores, stratified by TNM stage I–III.** TSR, tumor-stroma ratio; TIL, tumor-infiltrating lymphocyte; TNM, tumor-node-metastasis.

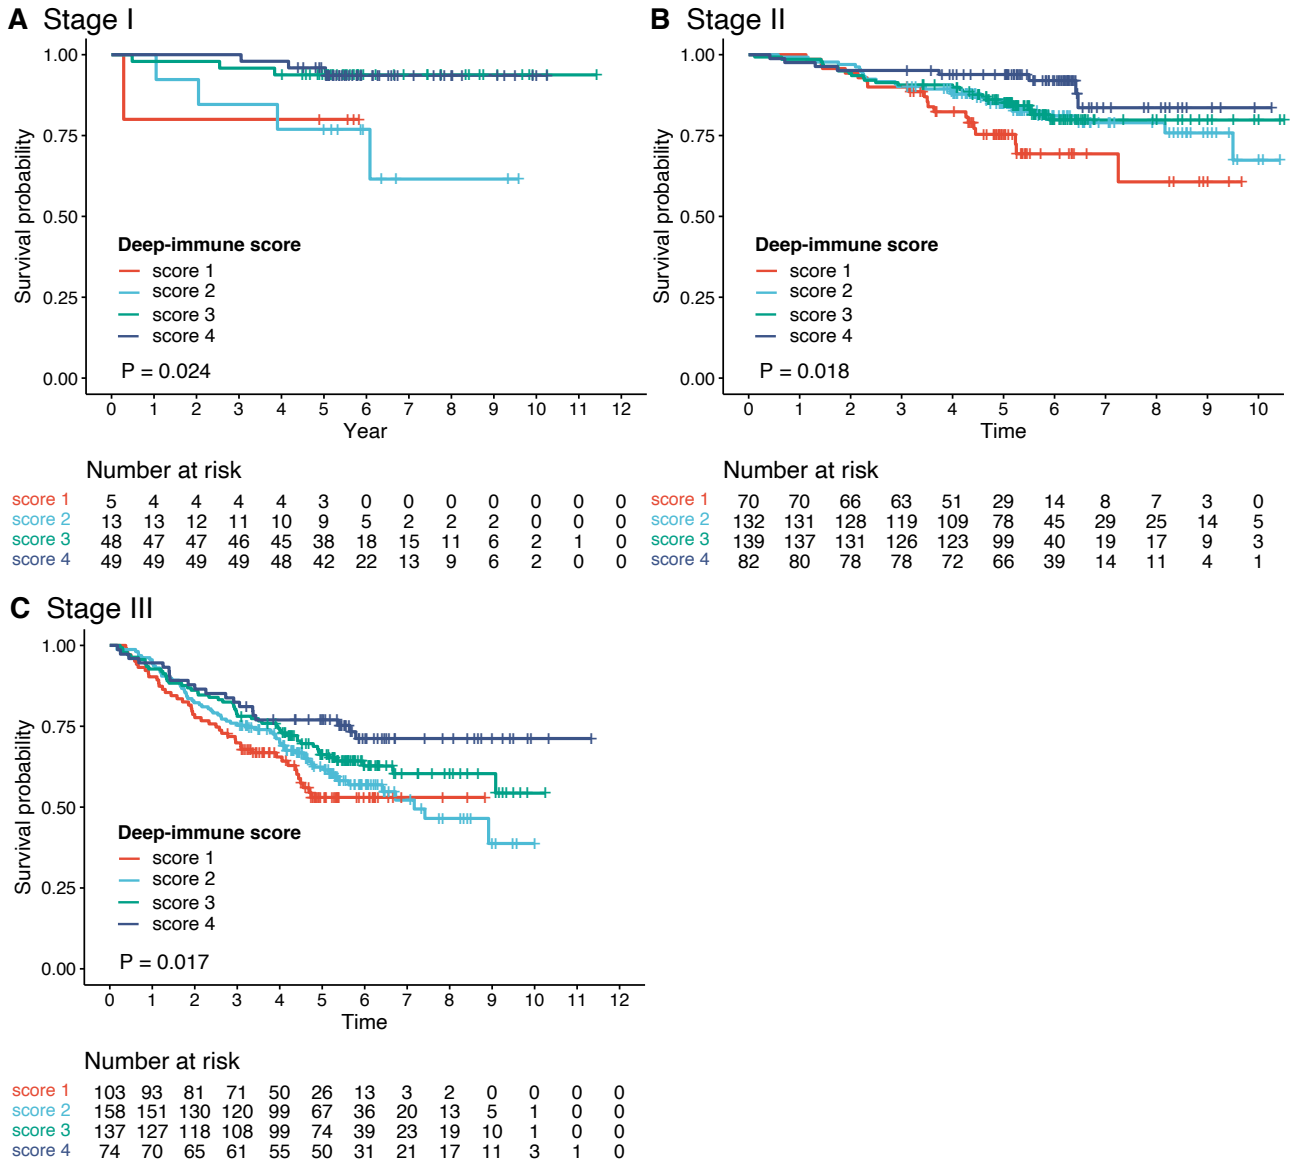

**Fig. S4 Kaplan–Meier plots for all patients according to Deep-immune score, stratified by TNM stage.** TNM, tumor-node-metastasis.



## **Additional Tables**

**Table S1.** Stain type, stain location, and digital slide scanner for 3 different hospitals

| <b>Center</b>      | <b>Stain type</b> | <b>Stain location</b>         | <b>Digital slide scanner</b>                         |
|--------------------|-------------------|-------------------------------|------------------------------------------------------|
| GDPH (Hospital 1)  | HE & IHC          | Department of pathology, GDPH | Aperio AT2, Leica, USA                               |
| YNCH (Hospital 2)  | HE                | Department of pathology, YNCH | Aperio AT2, Leica, USA &<br>KF-PRO-020, KFBIO, China |
| SYSU6 (Hospital 3) | HE & IHC          | Department of pathology, GDPH | Aperio GT 450, Leica, USA                            |

Abbreviations: GDPH, Guangdong Provincial People's Hospital; YNCH, Yunnan Cancer Hospital; SYSU6, The Sixth Affiliated Hospital of Sun Yat-sen University; IHC, immunohistochemistry; HE, hematoxylin and eosin.

**Table S2.** The distributions of demographic and clinicopathologic characteristics of colorectal cancer patients in the two cohorts

|                              | Primary cohort | Validation cohort | P       |
|------------------------------|----------------|-------------------|---------|
| <b>Age (year, mean ± SD)</b> | 63.37 ± 12.24  | 59.15 ± 13.07     | <0.001* |
| <b>Sex</b>                   |                |                   | 1#      |
| Male                         | 325 (59.7%)    | 279 (59.9%)       |         |
| Female                       | 219 (40.3%)    | 187(40.1%)        |         |
| <b>TNM</b>                   |                |                   | 0.003#  |
| I                            | 79 (14.5%)     | 36 (7.7%)         |         |
| II                           | 221 (40.6%)    | 202 (43.3%)       |         |
| III                          | 244 (44.9%)    | 228(48.9%)        |         |
| <b>Location</b>              |                |                   | <0.001# |
| Colon                        | 312 (57.4%)    | 170 (36.5%)       |         |
| Rectum                       | 232 (42.6%)    | 296 (63.5%)       |         |
| <b>CEA</b>                   |                |                   | <0.001# |
| Normal                       | 331 (60.8%)    | 257 (55.2%)       |         |
| Abnormal                     | 166 (30.5%)    | 204 (43.8%)       |         |
| NA                           | 47 (8.6%)      | 5 (1.1%)          |         |
| <b>Grade</b>                 |                |                   | <0.001# |
| Low                          | 487 (89.5%)    | 300 (64.4%)       |         |
| High                         | 57 (10.5%)     | 149 (32.0%)       |         |
| NA                           | 0 (0%)         | 17 (3.6%)         |         |

Note: P-value was performed by t-test or  $\chi^2$  test where appropriate. (\* t-test; # Chi-square test)

Abbreviation: SD, standard deviation; TNM, tumor-node-metastasis; CEA, carcinoembryonic antigen.

**Table S3.** CD3<sup>+</sup> T cells density in the stroma region stratified by Deep-TSR, Deep-TIL, and Deep-immune scores

|                          |        | Stroma-CD3 <sup>+</sup> T cells density (mean ± SD, cells/mm <sup>2</sup> ) |                   |
|--------------------------|--------|-----------------------------------------------------------------------------|-------------------|
|                          |        | Primary cohort                                                              | Validation cohort |
| <b>Deep-TSR score</b>    | Low    | 1350.13 ± 677.56                                                            | 1596.31 ± 557.81  |
|                          | High   | 1011.41 ± 582.04                                                            | 1310.81 ± 665.56  |
| <b>Deep-TIL score</b>    | Low    | 1001.04 ± 518.93                                                            | 714.49 ± 541.38   |
|                          | Middle | 1261.35 ± 635.78                                                            | 1085.43 ± 381.10  |
|                          | High   | 1512.73 ± 744.68                                                            | 1561.36 ± 630.51  |
| <b>Deep-immune score</b> | 1      | 844.21 ± 429.48                                                             | 465.69 ± 261.19   |
|                          | 2      | 1087.60 ± 548.92                                                            | 996.95 ± 421.80   |
|                          | 3      | 1246.27 ± 666.92                                                            | 1404.56 ± 621.30  |
|                          | 4      | 1705.75 ± 690.32                                                            | 1679.24 ± 574.65  |

Abbreviation: TSR, tumor-stroma ratio; TIL, tumor-infiltrating lymphocyte; SD, standard deviation.

**Table S4.** The prediction performance in two cohorts

|                                            | Primary cohort      |       | Validation cohort   |       |
|--------------------------------------------|---------------------|-------|---------------------|-------|
|                                            | C-index (95% CI)    | iAUC  | C-index (95% CI)    | iAUC  |
| <b>Deep-TSR score</b>                      | 0.557 (0.519–0.596) | 0.550 | 0.568 (0.521–0.615) | 0.567 |
| <b>Deep-TIL score</b>                      | 0.583 (0.539–0.627) | 0.587 | 0.576 (0.523–0.629) | 0.580 |
| <b>Deep-immune score</b>                   | 0.605 (0.562–0.648) | 0.606 | 0.602 (0.549–0.656) | 0.605 |
| <b>TNM stage</b>                           | 0.653 (0.617–0.690) | 0.647 | 0.625 (0.579–0.672) | 0.626 |
| <b>Age</b>                                 | 0.588 (0.541–0.636) | 0.591 | 0.601 (0.546–0.657) | 0.589 |
| <b>CEA</b>                                 | 0.626 (0.586–0.666) | 0.611 | 0.600 (0.552–0.647) | 0.583 |
| <b>TNM + Age + CEA</b>                     | 0.720 (0.682–0.759) | 0.713 | 0.689 (0.641–0.738) | 0.676 |
| <b>Deep-immune score + TNM + Age + CEA</b> | 0.732 (0.695–0.770) | 0.726 | 0.701 (0.652–0.751) | 0.691 |

Abbreviations: CI, confidence interval; iAUC, the integrated area under the ROC curve; TSR, tumor-stroma ratio; TIL, tumor-infiltrating lymphocytes; TNM, tumor-node-metastasis; CEA, carcinoembryonic antigen.
